# Supplementary material for: Overnight polysomnography and the recording of sleep and sleep-related respiration in orchestra musicians – possible protective effects of wind instruments on respiration
Source: PLOS journal article supplement (doi:10.1371/journal.pone.0231549), 2020-04-15
Supplement: S1 (10.1371/journal.pone.0231549.s001) [file journal.pone.0231549.s001.pdf]

| Pb | BMI (kg/m <sup>2</sup> ) | gender<br>m=male<br>f=female | age (range of years) | instrument<br>1=string<br>2=wind | instrument (text) | Instrument (text details) | allergies<br>1=yes<br>0=no | allergies (text)                      | alcohol<br>1=yes<br>0=no | alcohol (text)      | medication<br>1=yes<br>0=no |
|----|--------------------------|------------------------------|----------------------|----------------------------------|-------------------|---------------------------|----------------------------|---------------------------------------|--------------------------|---------------------|-----------------------------|
| 1  | 26                       | w                            | 28-56                | 1                                | string            | violin                    | 1                          | hayfever                              |                          | 0                   | 0                           |
| 2  |                          | m                            | 28-56                | 2                                | wind              | bassoon                   | 0                          | 0                                     |                          | 0.2 l (10pm)        | 1                           |
| 3  | 27                       | m                            | 28-56                | 2                                | wind              | clarinet                  | 0                          | 0                                     |                          | 0.05 ml anis spirit | 0                           |
| 4  |                          | m                            | 28-56                | 1                                | string            | viola                     | 1                          | hayfever, cat hair, pollen            |                          | 0                   | 0                           |
| 5  | 25                       | m                            | 28-56                | 1                                | string            | cello                     | 1                          | cat hair                              |                          | 0.5 l beer (10pm)   | 0                           |
| 6  |                          | m                            | 28-56                | 1                                | string            | cello                     | 0                          | 0                                     |                          | 0                   | 0                           |
| 7  | 19                       | m                            | 28-56                | 1                                | string            | violin                    | 1                          | hayfever                              |                          | 0                   | 1                           |
| 8  | 23                       | m                            | 28-56                | 1                                | string            | viola                     | 1                          | penicillin                            | 1                        | 0.2 l vine (8pm)    | 0                           |
| 9  | 27                       | f                            | 28-56                | 2                                | wind              | flute                     | 0                          | 0                                     |                          |                     | 1                           |
| 10 | 21                       | m                            | 28-56                | 1                                | string            | cello                     | 1                          | penicillin, tropical fruits, hayfever | 1                        | 1 l beer (till 1am) | 0                           |
| 11 | 25                       | m                            | 28-56                | 1                                | string            | violin                    | 1                          | hayfever, cat hair, mold, birch       | 0                        | 0                   | 0                           |
| 12 | 20                       | f                            | 28-56                | 1                                | string            | bass                      | 0                          | 0                                     | 0                        | 0                   | 1                           |
| 13 | 21                       | m                            | 28-56                | 1                                | string            | violin                    |                            |                                       | 1                        | 0.2 l vine (10pm)   | 0                           |
| 14 | 26                       | f                            | 28-56                | 1                                | string            | viola                     | 1                          | ciprobay                              | 0                        | 0                   | 0                           |
| 15 | 22                       | m                            | 28-56                | 2                                | wind              | oboe                      | 0                          | 0                                     | 0                        | 0                   | 0                           |
| 16 | 30                       | m                            | 28-56                | 1                                | string            | violin                    |                            |                                       | 1                        | 0.2 l vine          | 1                           |
| 17 | 27                       | m                            | 28-56                | 1                                | string            | bass                      | 1                          | hayfever                              | 1                        | 0.2 l prosecco      | 1                           |
| 18 |                          | f                            | 28-56                | 1                                | string            | violin                    | 0                          | 0                                     | 0                        | 0                   | 0                           |
| 20 | 24                       | f                            | 28-56                | 1                                | string            | violin                    | 0                          | 0                                     | 0                        | 0                   | 1                           |
| 21 | 22                       | f                            | 28-56                | 2                                | wind              | flute                     | 0                          | 0                                     | 0                        | 0                   | 0                           |
| 22 | 25                       | m                            | 28-56                | 2                                | wind              | trumpet                   | 0                          | 0                                     | 0                        | 0                   | 0                           |
| 23 | 25                       | m                            | 28-56                | 2                                | wind              | horn                      | 0                          | 0                                     | 0                        | 0                   | 0                           |
| 24 | 24                       | m                            | 28-56                | 2                                | wind              | oboe                      | 0                          | 0                                     | 0                        | 0                   | 1                           |
| 28 | 29                       | m                            | 28-56                | 2                                | wind              | clarinet                  | 0                          | 0                                     | 0                        | 0                   | 0                           |
| 30 | 25                       | m                            | 28-56                | 2                                | wind              | trombone                  | 1                          | grass, pollen                         | 0                        | 0                   | 0                           |
| 31 | 23                       | m                            | 28-56                | 2                                | wind              | flute                     | 1                          | cat hair                              | 1                        | 0.2 l vine          | 0                           |
| 32 | 34                       | m                            | 28-56                | 2                                | wind              | horn                      | 1                          | grass, pollen, penicillin             | 0                        | 0                   | 1                           |
| 33 | 20                       | f                            | 28-56                | 2                                | wind              | oboe                      | 0                          | 0                                     | 1                        | 1 beer              | 0                           |
| 34 | 22                       | m                            | 28-56                | 2                                | wind              | horn                      | 1                          | grass, pollen                         | 0                        | 0                   | 0                           |

| medication (text)                         | surgery 1=yes 0=no | surgery (text)                                   | sport 1=yes 0=no | Playing Instrument (days/ week) | Playing Instrument (years) | light off (time) | light on (time) | SE (%) | TIB (min) |
|-------------------------------------------|--------------------|--------------------------------------------------|------------------|---------------------------------|----------------------------|------------------|-----------------|--------|-----------|
| 0                                         | 0                  | 0                                                | 1                | 4                               | 19                         | 00:58:00         | 08:05:00        | 88     | 427       |
| 20 mg nexium                              | 0                  | 0                                                | 1                | 4                               | 33                         | 00:10:00         | 06:10:00        | 89     | 360       |
| 0                                         | 0                  | 0                                                | 0                |                                 |                            | 01:00:00         | 08:30:00        | 85     | 450       |
| 0                                         | 1                  | nasal septum, tonsillectomy, Cholezystektomie    | 0                |                                 |                            | 03:00:00         |                 | 91     |           |
| 0                                         | 0                  | 0                                                | 1                |                                 | 41                         | 23:45:00         | 06:21:00        | 92     | 396       |
| 0                                         | 0                  | 0                                                | 0                |                                 |                            | 01:30:00         |                 | 79     |           |
| Delix                                     | 0                  | 0                                                | 0                |                                 |                            |                  |                 | 89     |           |
| 0                                         | 1                  | tonsillectomy                                    | 0                | 3                               | 48                         | 00:45:00         | 08:00:00        | 86     | 435       |
| L-thyroxin (eye pressure)                 | 1                  | eye surgery, thyroid                             | 0                |                                 |                            | 00:25:00         | 08:00:00        | 86     | 455       |
| 0                                         | 0                  | 0                                                | 0                |                                 | 27                         | 02:15:00         | 08:15:00        | 66     | 360       |
| 0                                         | 1                  | variceal surgery                                 | 1                |                                 | 37                         | 23:40:00         | 06:30:00        | 82     | 410       |
| antibaby pill                             | 0                  | 0                                                | 1                | 5                               | 15                         | 00:54:00         | 08:15:00        | 95     | 501       |
| 0                                         | 0                  | 0                                                | 0                |                                 | 23                         | 01:30:00         | 11:00:00        | 84     | 570       |
| 0                                         | 0                  | 0                                                | 1                |                                 | 20                         | 01:04:00         | 08:00:00        | 87     | 416       |
| 0                                         | 0                  | 0                                                | 0                | 2.5                             | 21                         | 23:55:00         | 07:00:00        | 92     | 425       |
| homeopathic                               | 1                  | cervical spine, laryngeal surgery, ENT, meniscus | 1                | 1                               | 45                         | 00:15:00         | 08:55:00        | 65     | 520       |
| ezetrol                                   | 0                  | 0                                                | 0                |                                 | 27                         | 23:35:00         | 07:00:00        | 7      | 445       |
| 0                                         | 0                  | 0                                                | 0                |                                 |                            | 01:30:00         |                 | 74     |           |
| nasal spray                               | 1                  | tonsillectomy                                    | 0                |                                 |                            | 00:33:00         | 07:15:00        | 85     | 402       |
| 0                                         | 1                  | ENT                                              | 0                |                                 |                            | 00:30:00         | 07:15:00        | 89     | 405       |
| 0                                         | 1                  | inguinal hernia                                  | 1                | 2.5                             | 25                         | 23:45:00         | 08:30:00        | 89     | 525       |
| 0                                         | 1                  | variceal surgery                                 | 0                | 1                               | 23                         | 23:50:00         | 06:20:00        | 78     | 390       |
| salbutamol 1x/d                           | 1                  | nasal septum deviation                           | 1                | 2                               | 25                         | 00:30:00         |                 | 89     |           |
| 0                                         | 0                  | 0                                                | 1                | 2.5                             | 32                         | 23:30:00         | 07:08:00        | 94     | 458       |
| 0                                         | 0                  | 0                                                | 1                | 2.5                             | 21                         | 00:30:00         | 07:00:00        | 93     | 390       |
| 0                                         | 1                  | nasal septum, dental extraction                  | 1                | 1                               | 38                         | 00:15:00         | 08:00:00        | 92     | 465       |
| syntaris (flumisolid) 1-0-0 (nasal spray) | 1                  | tonsillectomy, dental extraction                 | 0                | 2.5                             | 23                         | 01:40:00         | 08:10:00        | 95     | 390       |
| 0                                         | 0                  | 0                                                | 1                | 2                               | 27                         | 01:29:00         | 08:13:00        | 96     | 404       |
| 0                                         | 1                  | tonsillectomy                                    | 1                | 2                               | 31                         | 00:20:00         | 08:50:00        | 82     | 510       |

| TST (hours) | TST (min) | SL2 (min) | REM_L (min) | WASO (min) | NREM1 (% of SPT) | NREM2 (% of SPT) | SWS (% of SPT) | REM (% of SPT) | AHI (events/h) | HI (events/h) | AI (events/h) | SpO2_min (%) | SpO2_avg (%) | arousal (number/h) |
|-------------|-----------|-----------|-------------|------------|------------------|------------------|----------------|----------------|----------------|---------------|---------------|--------------|--------------|--------------------|
| 06:53       | 413       | 47        | 92          | 9          | 9                | 49               | 26             | 15             | 0              | 0             | 0             | 81           | 99           | 18                 |
| 05:47       | 347       | 27        | 68          | 8          | 3                | 45               | 38             | 12             | 1              | 1             | 0             | 93           | 98           | 22                 |
| 07:23       | 443       | 28        | 74          | 53         | 17               | 51               | 10             | 12             | 0              | 0             | 0             | 69           | 95           | 20                 |
| 06:17       | 377       | 13        | 65          | 27         | 2                | 62               | 9              | 21             | 5              | 2             | 2             | 89           | 98           | 22                 |
| 05:27       | 327       | 7         | 6           | 21         | 7                | 52               | 18             | 19             | 6              | 5             | 1             | 84           | 95           | 11                 |
| 05:17       | 317       | 27        | 87          | 29         | 5                | 41               | 38             | 8              | 0              | 0             | 0             | 96           | 100          | 11                 |
| 08:02       | 482       | 13        | 116         | 47         | 10               | 41               | 26             | 15             | 1              | 0             | 0             | 83           | 100          | 24                 |
| 07:03       | 423       | 65        | 62          | 11         | 8                | 50               | 24             | 18             | 4              | 2             | 2             | 85           | 97           | 17                 |
| 06:54       | 414       | 56        | 71          | 20         | 10               | 50               | 21             | 17             | 1              | 0             | 1             | 93           | 100          | 11                 |
| 05:24       | 324       | 99        | 86          | 16         | 12               | 60               | 14             | 12             | 1              | 1             | 1             | 92           | 99           | 12                 |
| 05:50       | 350       | 13        | 67          | 55         | 5                | 45               | 22             | 16             | 5              | 5             | 1             | 91           | 96           | 14                 |
| 07:40       | 460       | 12        | 52          | 14         | 4                | 42               | 42             | 9              | 0              | 0             | 0             | 91           | 100          | 21                 |
| 08:12       | 492       | 66        | 74          | 46         | 15               | 36               | 26             | 18             | 2              | 2             | 0             | 89           | 98           | 14                 |
| 06:34       | 394       | 25        | 125         | 36         | 12               | 47               | 20             | 13             | 1              | 1             | 0             | 93           | 100          | 15                 |
| 06:30       | 390       | 8         | 59          | 23         | 16               | 37               | 26             | 16             | 3              | 3             | 0             | 86           | 98           | 5                  |
| 05:37       | 337       | 6         | 45          | 95         | 14               | 38               | 3              | 22             | 7              | 3             | 4             | 91           | 97           | 26                 |
| 06:31       | 391       | 8         | 80          | 41         | 11               | 33               | 35             | 12             | 14             | 9             | 4             | 86           | 96           | 15                 |
| 05:39       | 339       | 80        | 74          | 43         | 7                | 49               | 16             | 19             | 1              | 1             | 0             | 95           | 100          | 13                 |
| 06:10       | 370       | 34        | 121         | 32         | 5                | 52               | 16             | 20             |                |               |               | 94           | 100          | 28                 |
| 06:10       | 370       | 14        | 60          | 35         | 5                | 45               | 23             | 19             | 0              | 0             | 0             | 96           | 99           | 23                 |
| 07:44       | 464       | 49        | 71          | 4          | 7                | 44               | 27             | 22             | 7              | 4             | 3             | 87           | 98           | 15                 |
| 05:28       | 328       | 34        | 155         | 27         | 11               | 55               | 19             | 7              | 18             | 12            | 6             | 89           | 98           | 16                 |
| 05:41       | 341       | 33        | 138         | 6          | 7                | 51               | 29             | 12             | 6              | 4             | 2             | 86           | 98           | 19                 |
| 07:09       | 429       | 7         | 71          | 16         | 6                | 63               | 13             | 14             | 3              | 3             | 0             | 91           | 97           | 18                 |
| 06:03       | 363       | 7         | 103         | 22         | 3                | 56               | 11             | 26             | 0,7            | 0             | 1             | 91           | 98           | 8                  |
| 05:29       | 329       | 5         | 61          | 28         | 7                | 61               | 12             | 13             | 2              | 0             | 2             | 90           | 96           | 13                 |
| 06:11       | 371       | 1         | 69          | 15         | 3                | 61               | 14             | 19             | 6              | 4             | 1             | 83           | 98           | 2                  |
| 06:27       | 387       | 2         | 62          | 13         | 9                | 65               | 4              | 20             | 0              | 0             | 0             | 88           | 95           | 3                  |
| 06:59       | 419       | 28        | 146         | 70         | 16               | 48               | 3              | 19             | 3              | 1             | 2             | 89           | 99           | 4                  |

| snoring<br>(% of TST) | SPT<br>(min) | PSQI | ESS | FEPS-<br>focusing | FEPS-<br>brooding | D-MEQ |
|-----------------------|--------------|------|-----|-------------------|-------------------|-------|
| 0                     | 418          | 4    | 9   | 11                | 35                | 41    |
| 49                    | 454          |      | 6   |                   |                   |       |
| 39                    | 490          | 2    |     | 13                | 18                | 42    |
| 16                    | 402          | 4    | 1   | 12                | 19                | 59    |
| 0                     | 345          | 3    | 7   | 11                | 19                | 48    |
| 66                    | 344          | 4    | 3   | 9                 | 19                | 42    |
| 27                    | 527          |      |     |                   |                   |       |
| 23                    | 425          | 3    | 9   | 12                | 26                | 53    |
| 0                     | 427          | 5    | 5   | 13                | 49                | 44    |
| 0                     | 330          | 7    | 8   | 20                | 40                | 38    |
| 9                     | 402          | 5    | 7   | 14                | 15                | 57    |
| 0                     | 472          | 4    | 6   | 13                | 27                | 47    |
| 29                    | 521          | 10   | 3   | 23                | 45                | 26    |
| 38                    | 426          | 3    | 11  | 17                | 33                | 48    |
| 41                    | 410          | 3    | 10  | 9                 | 30                | 48    |
| 36                    | 436          | 3    | 5   | 10                | 20                | 49    |
| 33                    | 420          | 6    | 7   | 18                | 21                | 68    |
| 0                     | 375          | 8    | 7   | 10                | 29                | 30    |
| 22                    | 401          | 4    | 14  | 23                | 16                | 29    |
| 44                    | 402          | 7    | 3   | 18                | 28                | 40    |
| 25                    | 466          | 2    | 12  | 15                | 31                | 59    |
| 52                    | 354          |      |     |                   |                   |       |
| 0                     | 347          | 7    | 12  | 14                | 35                | 49    |
| 18                    | 444          | 6    | 5   | 24                | 23                | 62    |
| 48                    | 383          | 1    | 9   | 16                | 38                | 34    |
| 31                    | 355          | 7    | 4   |                   |                   | 57    |
| 35                    | 385          | 2    | 11  | 15                | 33                | 44    |
| 28                    | 399          | 8    | 10  | 24                | 32                | 53    |
| 35                    | 482          | 11   | 7   | 20                | 51                | 56    |
